# Supplementary material for: Linear polymeric ionic liquids as phase-transporters for both cationic and anionic dyes with synergic effects
Source: Royal Society of Chemistry journal article supplement (doi:10.1039/c5py01123j), 2015-01-01
Supplement: c5py01123j1.pdf [file c5py01123j1.pdf]

## Supporting information

### Linear Polymeric Ionic Liquids as Phase-transporter for Both Cationic and Anionic Dyes with Synergic Effect

Hualei Zhao, Yanting Yu, Zonghao Li, Bin Luo, Xinhang Wang, Yanping Wang, Yumin Xia\*

State Key Laboratory for Modification of Chemical Fibers and Polymer Materials, Engineering Research Center of Technical Textiles, Ministry of Education, Key Laboratory of High Performance fibers & products, Ministry of Education, College of Materials Science and Engineering, Donghua University, 2999 North Renmin Road, Shanghai P. R. China 20162

\*Corresponding author. E-mail: xym@dhu.edu.cn

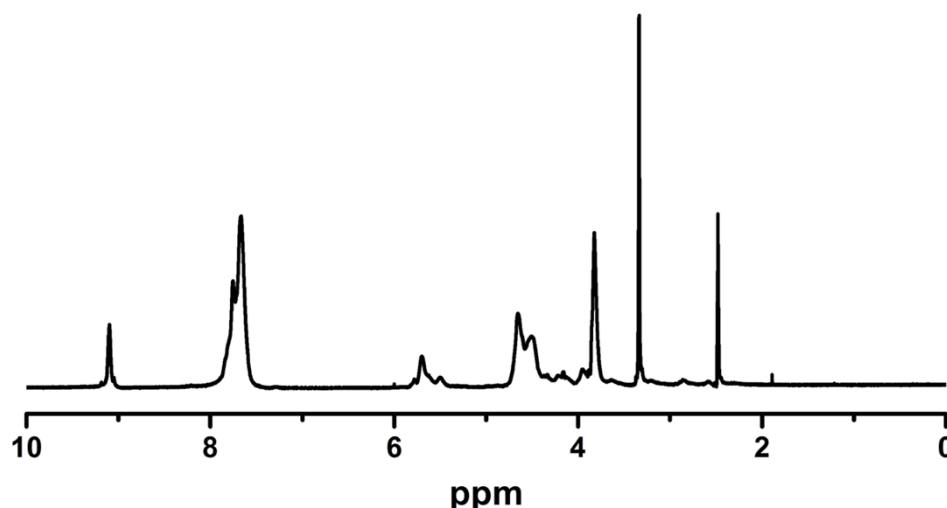

Fig. S1  $^1\text{H}$  NMR spectrum of [PEP-MIM] $\text{BF}_4$ .

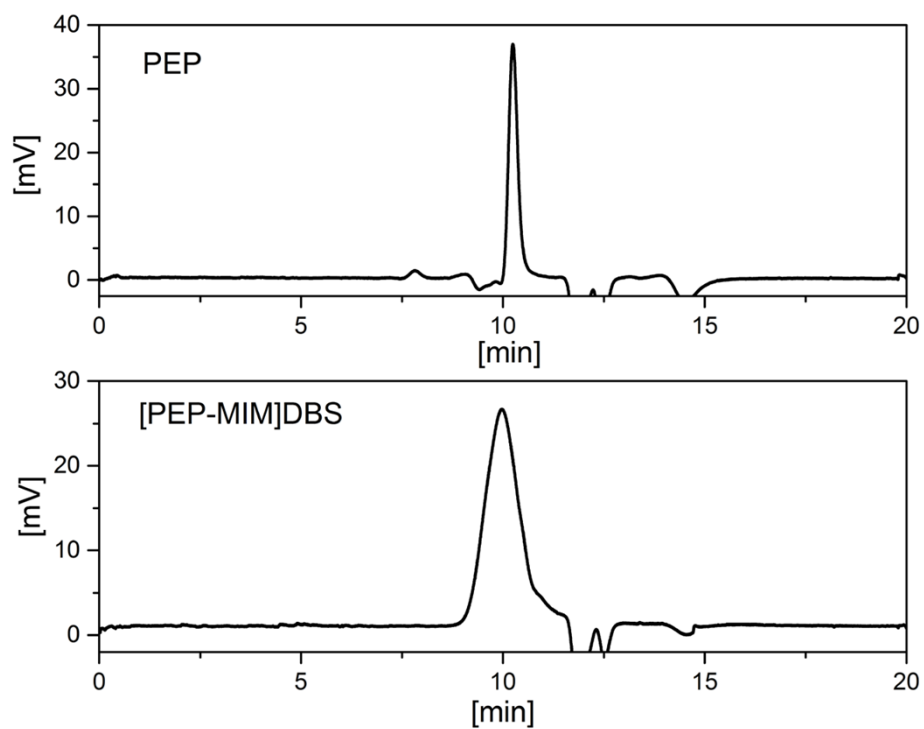

|              | $M_w$ | $M_n$ | PDI   |
|--------------|-------|-------|-------|
| PEP          | 5490  | 4200  | 1.3   |
| [PEP-MIM]DBS | 23800 | 151   | 158.4 |

**Fig. S2** GPC spectra of PEP and [PEP-MIM]DBS.

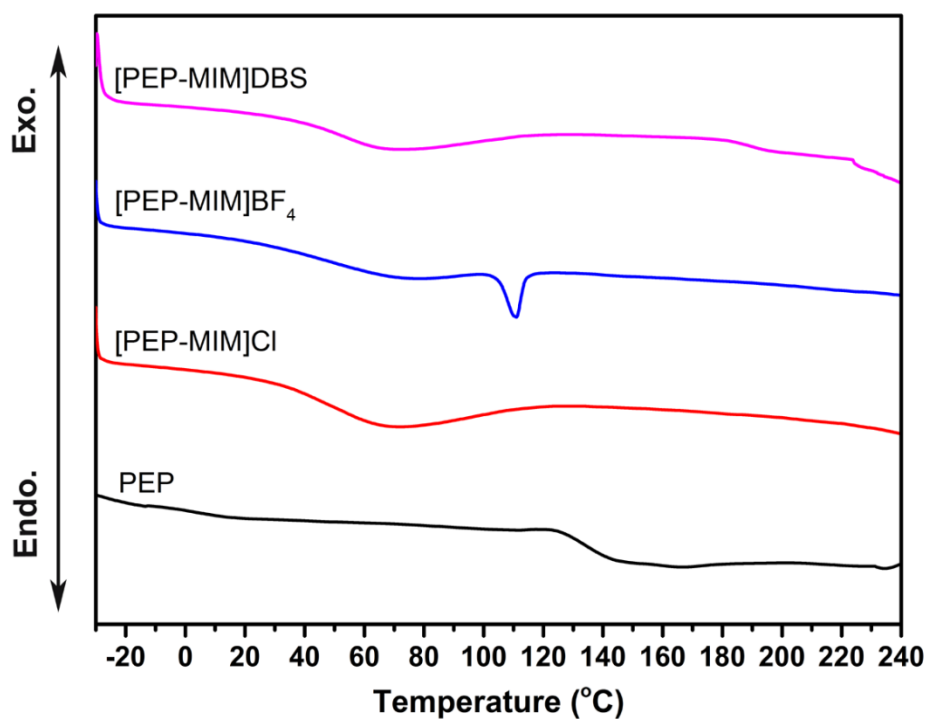

**Fig. S3** The DSC curves of polyester and polymer ionic liquids

**Table S1** Solubilities of polymeric ionic liquids with different anions.<sup>[a]</sup>

|                                 | PEP | [PEP-MIM]Cl | [PEP-MIM]BF <sub>4</sub> | [PEP-MIM]DBS |
|---------------------------------|-----|-------------|--------------------------|--------------|
| H <sub>2</sub> O                | —   | +           | —                        | —            |
| EtOH                            | —   | +           | —                        | —            |
| Acetone                         | +   | —           | —                        | —            |
| CHCl <sub>3</sub>               | +   | —           | —                        | +            |
| CH <sub>2</sub> Cl <sub>2</sub> | —   | —           | —                        | +            |
| CH <sub>3</sub> CN              | +   | +           | +                        | +            |
| THF                             | +   | —           | —                        | —            |
| Toluene                         | —   | —           | —                        | —            |
| DMF                             | +   | +           | +                        | +            |
| DMSO                            | +   | +           | +                        | +            |

<sup>[a]</sup> + =soluble, — = insoluble. DBS = dodecyl benzene sulfonate.

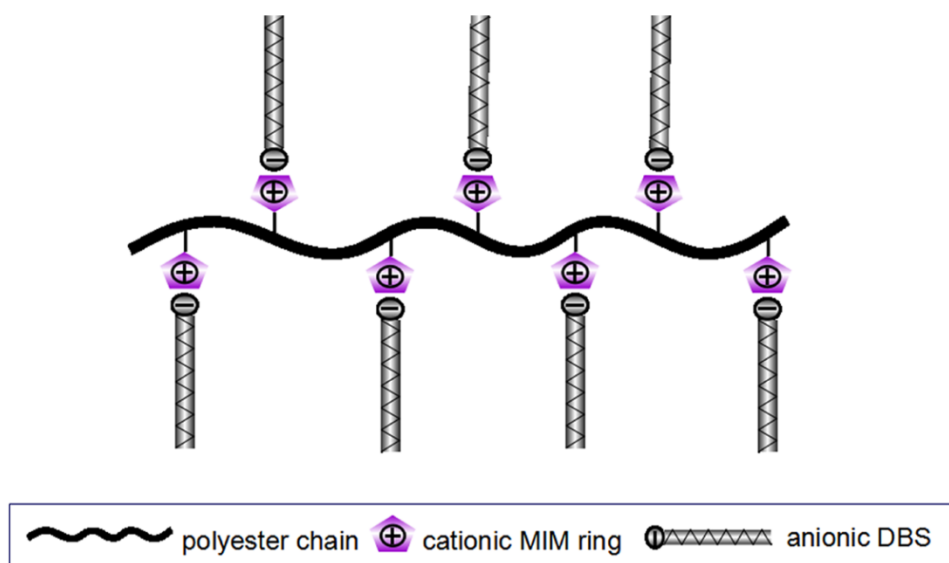

**Fig. S4** Structure diagram of polymeric ionic liquids [PEP-MIM]DBS.

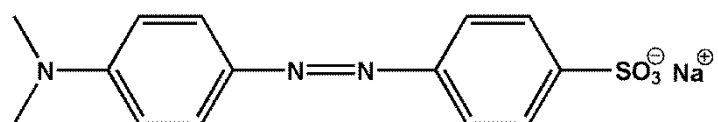

**Methyl Orange (MO)**

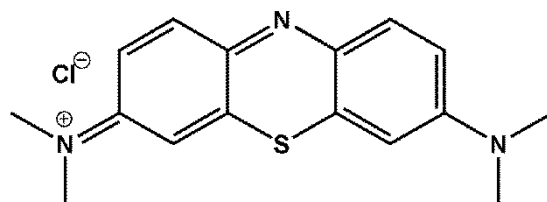

**Methylene Blue (MB)**

**Fig. S5** The molecular structure of water-soluble dyes.

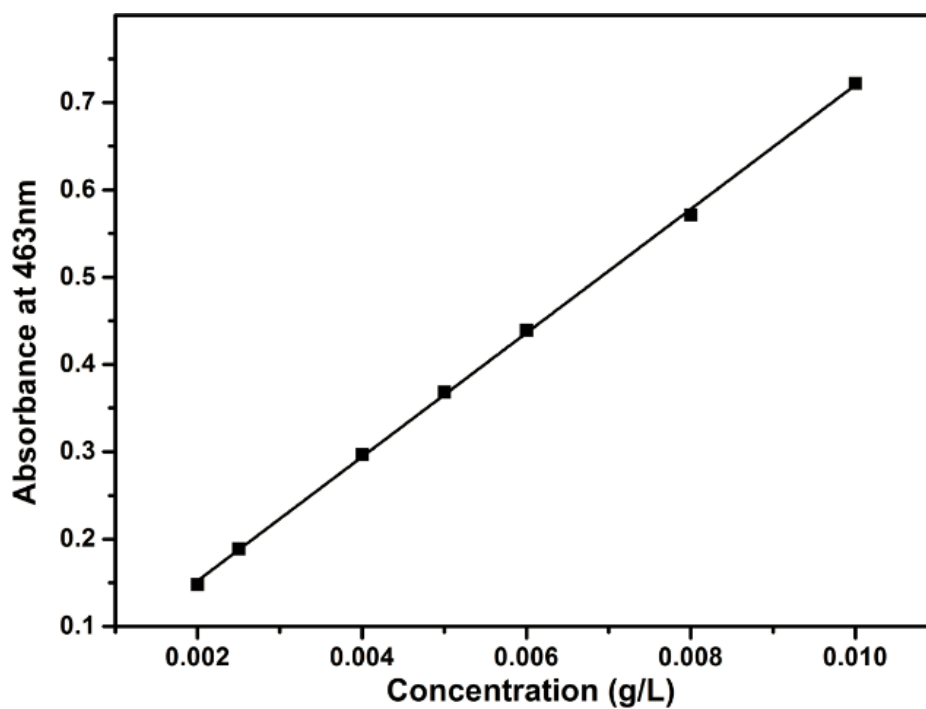

Fig. S6 The standard curve of methyl orange (MO) aqueous solution.

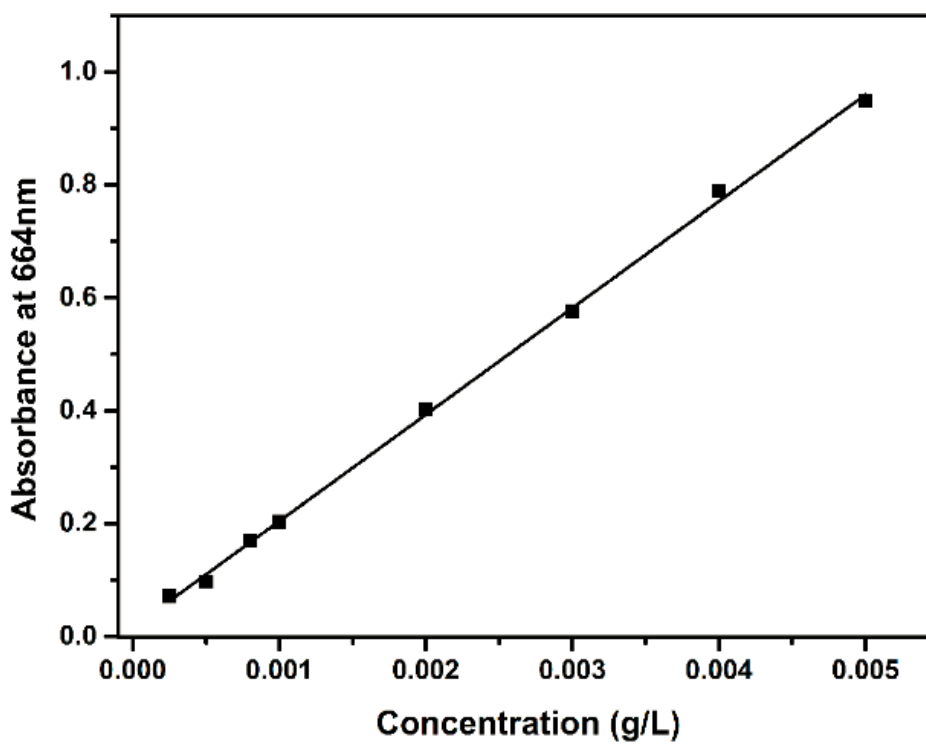

Fig. S7 The standard curve of methylene blue (MB) aqueous solution.

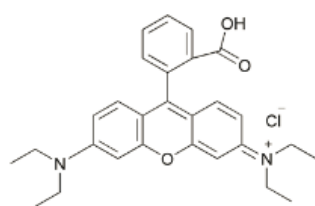

**Rhodamine B**

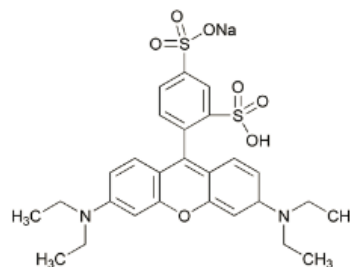

**Lissamine rhodamine B**

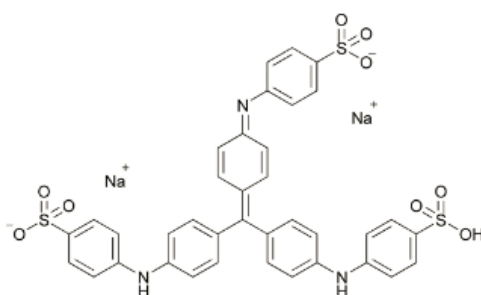

**Methyl blue**

**Fig. S8** The molecular structure of three water-soluble dyes.

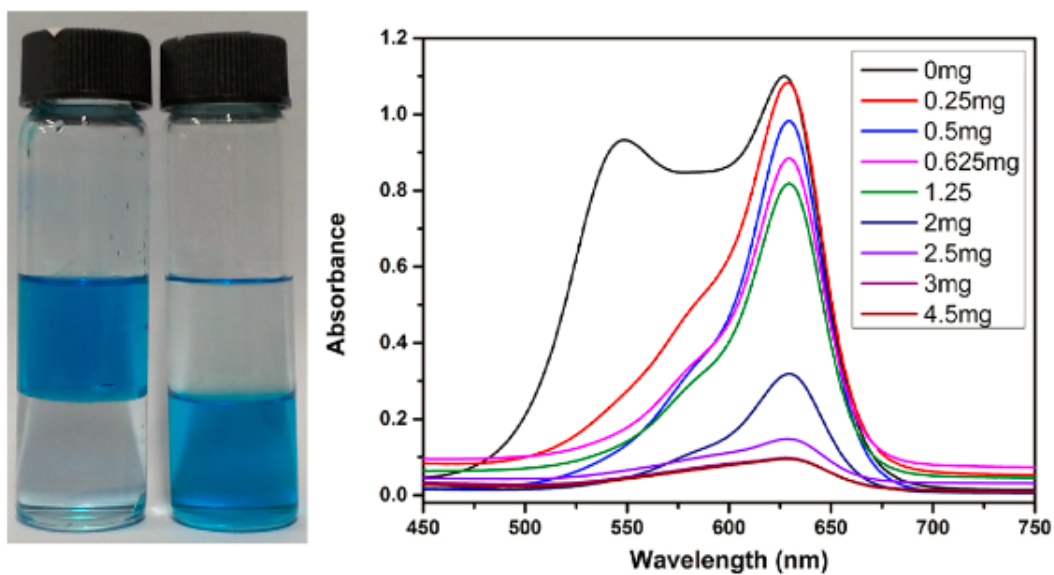

**Fig. S9** The photograph of methyl blue phase-transfer in water/ $\text{CHCl}_3$  (left); UV-Vis absorption spectra of the aqueous solution of methyl blue contacted with different amounts of [PEP-MIM]DBS in  $\text{CHCl}_3$ .

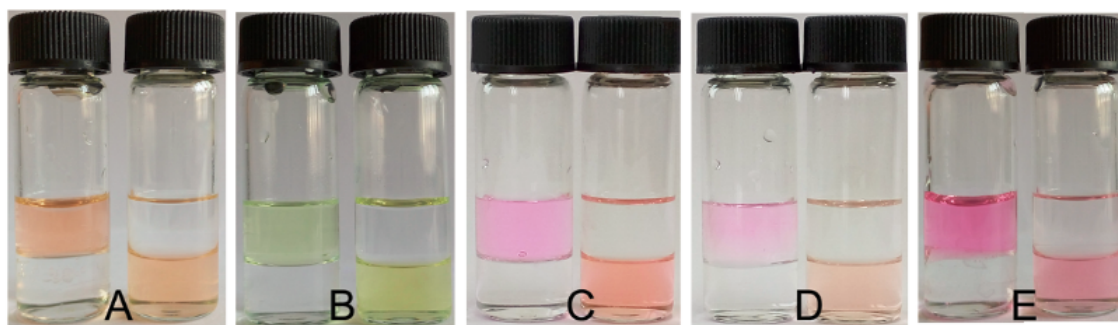

**Fig. S10** [PEP-MIM]DBS as transporter for water-soluble dyes Red HA3689(A), Reactive light yellow M-7G (B), Lissamine rhodamine B (C), Rhodamine B (D) and Bright red 3BF in water/ $\text{CHCl}_3$ ; the bottle of each photograph was shown for comparison.

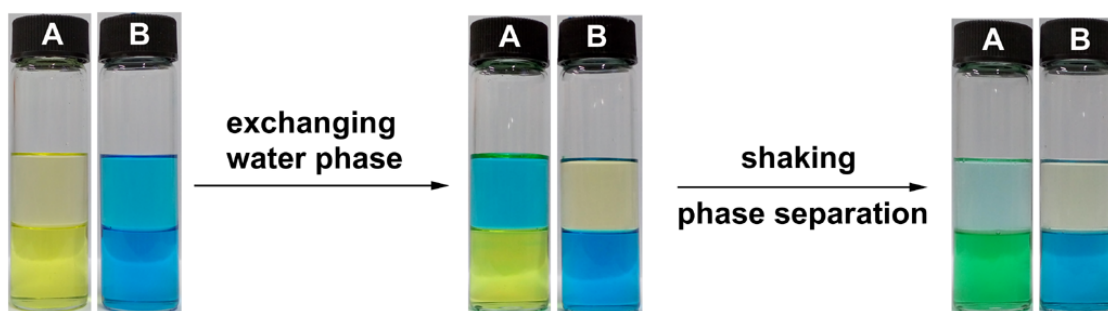

**Fig. S11** Schematic diagram of experiment
